# Supplementary material
Source: Springer Nature journal article supplement (https://www.springermedizin.de/resource/supplementary/12889_2011_3986_MOESM1_ESM.pdf/9491278)
Supplement: MOESM1 [file 9491278]

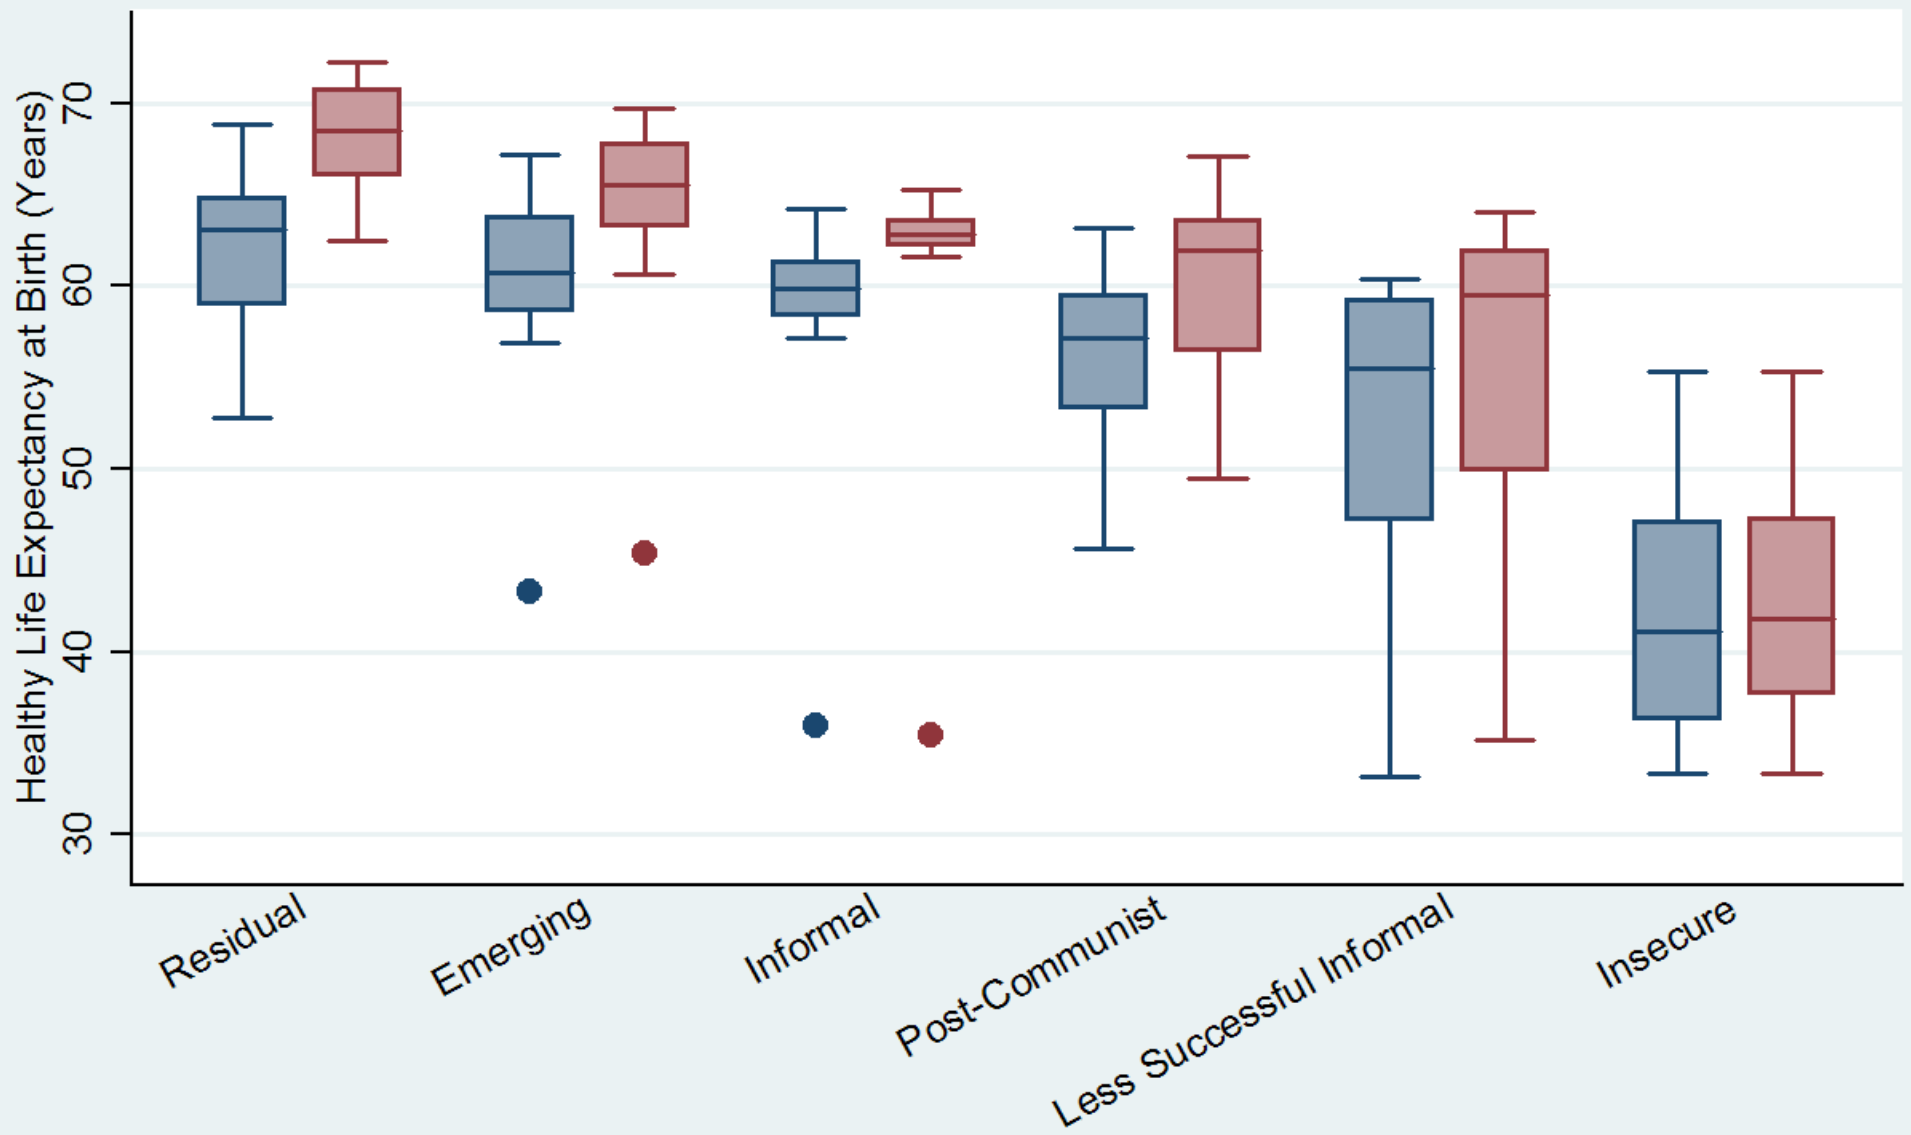

Healthy life expectancy (HALE) at birth (years), males, 2002  
Healthy life expectancy (HALE) at birth (years), females, 2002
